# Supplementary material for: Bacilli in the International Space Station
Source: MDPI journal article supplement (doi:10.3390/microorganisms10122309), 2022-11-22
Supplement: s1 [file s1]

*Supplementary materials*

**File S1: List of strains compared by the PATRIC Codon Trees service to construct the phylogenetic tree showed in Figure 2.**

- 1) *Geobacillus* sp. 12AMOR1
- 2) *Geobacillus kaustophilus* HTA426
- 3) *Geobacillus thermoleovorans* CCB\_US3\_UF5
- 4) *Geobacillus* sp. Y412MC61
- 5) *Geobacillus thermodenitrificans* NG80-2
- 6) *Geobacillus* sp. LC300
- 7) *Bacillus cytotoxicus* NVH 391-98
- 8) *Geobacillus thermoglucosidans* TNO-09.020
- 9) *Bacillus toyonensis* BCT-7112
- 10) *Bacillus thuringiensis* 97-27
- 11) *Bacillus cereus* B4264
- 12) *Bacillus cereus* ATCC 4342
- 13) *Bacillus cereus* F837/76
- 14) *Bacillus thuringiensis* HD682
- 15) *Bacillus cereus* strain ISSFR-23F
- 16) *Bacillus thuringiensis* str. Al Hakam
- 17) *Bacillus cereus* ATCC 14579
- 18) *Bacillus cereus* strain JEM-2
- 19) *Bacillus cereus* strain ISSFR-3F
- 20) *Bacillus cereus* strain NJ-W
- 21) *Bacillus cereus* strain ISSFR-9F
- 22) *Bacillus cereus* ATCC 10987
- 23) *Bacillus anthracis* strain delta Sterne
- 24) *Bacillus* sp. JEM-1 strain JEM-1

- 
- 25) *Bacillus* sp. S1-R4H1-FB strain S1-R4H1-FB
  - 26) *Bacillus anthracis* A0157
  - 27) *Bacillus mycoides* ATCC 6462
  - 28) *Bacillus thuringiensis* BMB171
  - 29) *Bacillus* sp. S2-R3J1-FB-BA1 strain S2-R3J1-FB-BA1
  - 30) *Bacillus anthracis* strain Han
  - 31) *Bacillus anthracis* strain Cvac02
  - 32) *Bacillus cereus* Q1
  - 33) *Bacillus anthracis* str. Ames
  - 34) *Bacillus anthracis* strain 2000031021
  - 35) *Bacillus anthracis* str. V770-NP-1R
  - 36) *Bacillus anthracis* strain Smith 1013
  - 37) *Bacillus* sp. S1-R1J2-FB strain S1-R1J2-FB
  - 38) *Bacillus cereus* FM1
  - 39) *Bacillus anthracis* PAK-1
  - 40) *Bacillus cereus* 03BB102
  - 41) *Bacillus* sp. ISSFR-25F strain ISSFR-25F
  - 42) *Bacillus weihenstephanensis* strain WSBC 10204
  - 43) *Bacillus cereus* strain FORC\_013
  - 44) *Bacillus cereus* biovar anthracis str. CI
  - 45) *Bacillus cereus* 03BB87
  - 46) *Bacillus* sp. S1-R2T1-FB strain S1-R2T1-FB
  - 47) *Bacillus bombysepticus* str. Wang
  - 48) *Bacillus anthracis* str. Sterne
  - 49) *Bacillus anthracis* RA3
  - 50) *Bacillus* sp. S1-R5C1-FB strain S1-R5C1-FB
  - 51) *Bacillus cereus* AH187
  - 52) *Bacillus anthracis* BA1015

- 
- 53) *Bacillus anthracis* Ohio ACB
  - 54) *Bacillus anthracis* str. Turkey32
  - 55) *Bacillus cereus* 3a
  - 56) *Bacillus anthracis* str. H9401
  - 57) *Bacillus anthracis* K3
  - 58) *Bacillus anthracis* Vollum 1B
  - 59) *Bacillus anthracis* str. SVA11
  - 60) *Bacillus cereus* D17
  - 61) *Bacillus mycoides* strain 219298
  - 62) *Bacillus anthracis* Pollino
  - 63) *Bacillus weihenstephanensis* KBAB4
  - 64) *Bacillus anthracis* 2002013094
  - 65) *Bacillus cereus* G9842
  - 66) *Bacillus anthracis* str. A16R
  - 67) *Bacillus cereus* AH820
  - 68) *Bacillus cereus* G9241
  - 69) *Bacillus anthracis* strain BFV
  - 70) *Bacillus thuringiensis* serovar kurstaki str. HD73
  - 71) *Bacillus anthracis* strain A1144
  - 72) *Bacillus anthracis* str. A0248
  - 73) *Bacillus anthracis* 9080-G
  - 74) *Bacillus cereus* E33L
  - 75) *Bacillus anthracis* str. CDC 684
  - 76) *Bacillus anthracis* 8903-G
  - 77) *Bacillus anthracis* str. 'Ames Ancestor'
  - 78) *Bacillus anthracis* 52-G
  - 79) *Bacillus thuringiensis* strain YGD22-03
  - 80) *Bacillus anthracis* str. A16

- 
- 81) *Bacillus anthracis* strain Stendal
  - 82) *Bacillus thuringiensis* serovar morrisoni strain BGSC
  - 83) *Bacillus thuringiensis* strain YWC2-8
  - 84) *Bacillus thuringiensis* strain HS18-1
  - 85) *Bacillus thuringiensis* serovar galleriae HD-29
  - 86) *Bacillus cereus* 03BB108
  - 87) *Bacillus thuringiensis* serovar indiana strain HD521
  - 88) *Bacillus thuringiensis* serovar kurstaki str. YBT-1520
  - 89) *Bacillus thuringiensis* serovar kurstaki HD 1
  - 90) *Bacillus thuringiensis* serovar kurstaki str. HD-1
  - 91) *Bacillus thuringiensis* HD-789
  - 92) *Bacillus thuringiensis* strain YC-10
  - 93) *Bacillus thuringiensis* serovar thuringiensis str. IS5056
  - 94) *Bacillus thuringiensis* serovar tolworthi
  - 95) *Bacillus thuringiensis* Bt407
  - 96) *Bacillus thuringiensis* HD1002

**File S2: List of genes/proteins selected by the PATRIC Codon Trees service to produce Figure 2.**

- 1) Excinuclease ABC subunit C
- 2) Oligoendopeptidase F
- 3) Phosphate regulon sensor protein PhoR (SphS) (EC 2.7.13.3)
- 4) Dihydrolipoamide dehydrogenase of branched-chain alpha-keto acid dehydrogenase (EC 1.8.1.4)
- 5) tRNA-i(6)A37 methylthiotransferase (EC 2.8.4.3)
- 6) N-acetylglucosamine-1-phosphate uridyltransferase (EC 2.7.7.23) / Glucosamine-1-phosphate N-acetyltransferase (EC 2.3.1.157)
- 7) Glycyl-tRNA synthetase (EC 6.1.1.14)
- 8) Dihydroorotase (EC 3.5.2.3)
- 9) 16S rRNA (cytosine(967)-C(5))-methyltransferase (EC 2.1.1.176)
- 10) ADP-ribose pyrophosphatase of COG1058 family (EC 3.6.1.13) / Nicotinamide-nucleotide amidase (EC 3.5.1.42)
- 11) Dihydrofolate synthase (EC 6.3.2.12) @ Folylpolyglutamate synthase (EC 6.3.2.17)
- 12) Cystathionine gamma-synthase (EC 2.5.1.48) @ O-acetylhomoserine sulfhydrylase (EC 2.5.1.49)
- 13) GTP-binding protein YqeH, required for biogenesis of 30S ribosome subunit
- 14) Uncharacterized MFS-type transporter YfkF
- 15) N-acetyl-L,L-diaminopimelate deacetylase (EC 3.5.1.47)
- 16) Phospho-N-acetylmuramoyl-pentapeptide-transferase (EC 2.7.8.13)
- 17) Tetraprenyl-beta-curcumen synthase (EC 4.2.3.130)
- 18) Heat-inducible transcription repressor HrcA
- 19) ABC transporter, permease protein EscB
- 20) UPF0348 protein family
- 21) Ribosomal protein L11 methyltransferase
- 22) DNA polymerase III delta subunit (EC 2.7.7.7)
- 23) Dipicolinate synthase subunit A
- 24) Allergen V5/Tpx-1 related
- 25) Stage 0 sporulation protein YaaT
- 26) (2E,6E)-farnesyl diphosphate synthase (EC 2.5.1.10)
- 27) Uncharacterized membrane protein YkvI

- 
- 28) UPF0701 protein YicC
  - 29) Prephenate dehydratase (EC 4.2.1.51)
  - 30) FIG00003568: ACT domain protein
  - 31) 2',3'-cyclic-nucleotide 2'-phosphodiesterase, Bsub YmdB
  - 32) Succinate dehydrogenase iron-sulfur protein (EC 1.3.5.1)
  - 33) 16S rRNA (cytidine(1402)-2'-O)-methyltransferase (EC 2.1.1.198)
  - 34) NAD kinase (EC 2.7.1.23)
  - 35) Chromosome (plasmid) partitioning protein ParB
  - 36) 3'-to-5' oligoribonuclease A, Bacillus type
  - 37) HesA/MoeB/ThiF family protein
  - 38) Efflux ABC transporter, permease protein
  - 39) FIG007013: polysaccharide deacetylase, putative
  - 40) NAD kinase (EC 2.7.1.23) homolog
  - 41) RNA polymerase sporulation specific sigma factor SigG
  - 42) Late competence protein ComER, proline oxidase (EC 1.5.1.2)
  - 43) 2,4-dienoyl-CoA reductase (EC 1.3.1.34)
  - 44) Quorum-quenching lactonase YtnP
  - 45) Ribonuclease III (EC 3.1.26.3)
  - 46) Phosphatidylserine decarboxylase (EC 4.1.1.65)
  - 47) Menaquinone-cytochrome C oxidoreductase, cytochrome C subunit
  - 48) Protein-glutamine gamma-glutamyltransferase (EC 2.3.2.13)
  - 49) Bis(5'-nucleosyl)-tetraphosphatase (asymmetrical) (EC 3.6.1.17)
  - 50) Uracil phosphoribosyltransferase (EC 2.4.2.9)
  - 51) Chromosome replication initiation protein DnaD
  - 52) KtrCD potassium uptake system, peripheral membrane component KtrC
  - 53) N-acetylglucosaminyl-L-malate N-acetyl hydrolase
  - 54) Peptidoglycan-N-acetylmuramic acid deacetylase PdaA
  - 55) Ribonuclease HII (EC 3.1.26.4)

- 
- 56) Heptaprenylglyceryl phosphate synthase (EC 2.5.1.n9)
  - 57) Stage IV sporulation protein FA (SpoIVFA)
  - 58) Uncharacterized protein YjaZ
  - 59) Endonuclease III (EC 4.2.99.18)
  - 60) SSU ribosomal protein S4p (S9e) @ SSU ribosomal protein S4p (S9e), zinc-independent
  - 61) Uracil-DNA glycosylase, family 1 (EC 3.2.2.27)
  - 62) Uncharacterized membrane protein YjbE
  - 63) Stage II sporulation protein related to metaloproteases (SpoIIQ)
  - 64) Peptidyl-tRNA hydrolase (EC 3.1.1.29)
  - 65) Acyl-CoA:1-acyl-sn-glycerol-3-phosphate acyltransferase (EC 2.3.1.51)
  - 66) Cell division protein FtsQ
  - 67) Uncharacterized protein YpeP
  - 68) Acetyltransferase, GNAT family
  - 69) KinB signaling pathway activation protein
  - 70) Spore cortex biosynthesis protein
  - 71) Transcription factor FapR
  - 72) 16S rRNA (guanine(1207)-N(2))-methyltransferase (EC 2.1.1.172)
  - 73) dCMP deaminase (EC 3.5.4.12) @ Late competence protein ComEB
  - 74) Stage III sporulation protein AF
  - 75) Transcriptional repressor for NAD biosynthesis in gram-positives
  - 76) Outer spore coat protein CotE
  - 77) DUF402 family nucleoside diphosphatase
  - 78) NADPH-dependent 7-cyano-7-deazaguanine reductase (EC 1.7.1.13)
  - 79) Hydrolase (HAD superfamily), YqeK
  - 80) UPF0234 protein Yitk
  - 81) ATP synthase delta chain (EC 3.6.3.14)
  - 82) Adenylate cyclase (EC 4.6.1.1)
  - 83) Ribonucleotide reductase transcriptional regulator NrdR

- 
- 84) 2H phosphoesterase superfamily protein Bsu1186 (yjcG)
  - 85) Peptide-methionine (S)-S-oxide reductase MsrA (EC 1.8.4.11)
  - 86) 16S rRNA (guanine(966)-N(2))-methyltransferase (EC 2.1.1.171)
  - 87) Uncharacterized protein YpjA
  - 88) Cell division initiation protein DivIVA
  - 89) RNA binding protein, contains ribosomal protein S1 domain
  - 90) Metal-dependent hydrolase YbeY, involved in rRNA and/or ribosome maturation and assembly
  - 91) Uncharacterized protein YisN
  - 92) FIG001553: Hydrolase, HAD subfamily IIIA
  - 93) Transamidase GatB domain protein
  - 94) Menaquinone-cytochrome C reductase iron-sulfur subunit
  - 95) Putative iron-sulfur cluster assembly scaffold protein for SUF system, SufE2
  - 96) LSU ribosomal protein L10p (P0)
  - 97) Ribose-5-phosphate isomerase B (EC 5.3.1.6)
  - 98) Histidine triad (HIT) nucleotide-binding protein, similarity with At5g48545 and yeast YDL125C (HNT1)
  - 99) D-aminoacyl-tRNA deacylase (EC 3.1.1.96)
  - 100) Peroxide stress regulator PerR, FUR family



**File S3: List of strains selected to construct the phylogenetic tree (PATRIC Codon Trees service) of the ISS strains, compared with the reference strains of the *Bacillus cereus* group, and showed in Figure 3.**

- 1) *Bacillus cereus* strain ISSFR-23F
- 2) *Bacillus cereus* strain JEM-2
- 3) *Bacillus cereus* strain ISSFR-3F
- 4) *Bacillus cereus* strain ISSFR-9F
- 5) *Bacillus cereus* ATCC 14579
- 6) *Bacillus* sp. JEM-1 strain JEM-1
- 7) *Bacillus* sp. S1-R4H1-FB strain S1-R4H1-FB
- 8) *Bacillus* sp. S2-R3J1-FB-BA1 strain S2-R3J1-FB-BA1
- 9) *Bacillus anthracis* str. Ames
- 10) *Bacillus* sp. S1-R1J2-FB strain S1-R1J2-FB
- 11) *Bacillus* sp. ISSFR-25F strain ISSFR-25F
- 12) *Bacillus cereus* biovar anthracis str. CI
- 13) *Bacillus* sp. S1-R2T1-FB strain S1-R2T1-FB
- 14) *Bacillus* sp. S1-R5C1-FB strain S1-R5C1-FB
- 15) *Bacillus thuringiensis* serovar kurstaki str. HD-1

**File S4: List of genes/proteins selected by the PATRIC Codon Trees service to produce Figure 3.**

- 1) Sensor histidine kinase/response regulator
- 2) Acetoacetyl-CoA synthetase [leucine] (EC 6.2.1.16)
- 3) membrane-anchoring domain / Glycerophosphoryl diester phosphodiesterase (EC 3.1.4.46)
- 4) Two-component sensor kinase SA14-24
- 5) Oligoendopeptidase F
- 6) CoA-disulfide reductase (EC 1.8.1.14) / Polysulfide binding and transferase domain
- 7) Argininosuccinate lyase-like protein
- 8) Glucan 1,4-alpha-maltohexaosidase (EC 3.2.1.98)
- 9) Endospore coat-associated protein YheD
- 10) Deoxyribodipyrimidine photolyase (EC 4.1.99.3)
- 11) Bis-ABC ATPase
- 12) DEAD-box ATP-dependent RNA helicase CshB (EC 3.6.4.13)
- 13) ATP-dependent RNA helicase BA2475
- 14) Spore cortex-lytic enzyme, N-acetylglucosaminidase SleL
- 15) Two-component system YycFG regulatory protein YycH
- 16) Niacin transporter NiaP
- 17) Oxalate/formate antiporter
- 18) Ornithine aminotransferase (EC 2.6.1.13)
- 19) Flavohemoglobin / Nitric oxide dioxygenase (EC 1.14.12.17)
- 20) ABC transporter, permease protein EscB
- 21) Aminotransferase BA2899
- 22) putative membrane protein
- 23) Cystathionine gamma-lyase (EC 4.4.1.1) @ Homocysteine desulfhydrase (EC 4.4.1.2)
- 24) Branched-chain amino acid dehydrogenase [deaminating] (EC 1.4.1.9)(EC 1.4.1.23)
- 25) N-acetyl-L,L-diaminopimelate deacetylase (EC 3.5.1.47)
- 26) Spore germination endopeptidase Gpr (EC 3.4.24.78)
- 27) Membrane metalloprotease

- 
- 28) Cytochrome d ubiquinol oxidase subunit II (EC 1.10.3.-)
  - 29) FIGfam013899: ABC transporter substrate-binding protein
  - 30) Cystathionine gamma-synthase (EC 2.5.1.48) @ O-acetylhomoserine sulfhydrylase (EC 2.5.1.49)
  - 31) Endospore coat-associated protein YutH
  - 32) ABC transporter, permease protein
  - 33) Oxidoreductase, Gfo/Idh/MocA family
  - 34) Zinc ABC transporter, substrate-binding protein ZnuA
  - 35) hypothetical protein
  - 36) Oxidoreductase, aldo/keto reductase family
  - 37) Transcriptional regulator in cluster with unspecified monosaccharide ABC transport system
  - 38) Molybdenum cofactor biosynthesis enzyme and related Fe-S oxidoreductases
  - 39) 3-Oxoadipate enol-lactonase, alpha/beta hydrolase fold family [EC:3.1.1.24]
  - 40) Ser/Thr protein phosphatase family protein
  - 41) Membrane protease family protein BA0301
  - 42) Cytochrome d ubiquinol oxidase subunit II (EC 1.10.3.-)
  - 43) Chromosome (plasmid) partitioning protein ParB
  - 44) UPF0750 membrane protein YvjA
  - 45) Quorum-quenching lactonase YtnP
  - 46) Glycine betaine ABC transport system, permease protein OpuAB
  - 47) RNA binding methyltransferase FtsJ like
  - 48) NAD synthetase (EC 6.3.1.5)
  - 49) Serine/threonine protein kinase
  - 50) 2',3'-cyclic-nucleotide 2'-phosphodiesterase, Bsub YmdB
  - 51) Uncharacterized membrane protein YkoY
  - 52) RNA polymerase sporulation specific sigma factor SigG
  - 53) Inositol-1-monophosphatase (EC 3.1.3.25)
  - 54) 2,4-dienoyl-CoA reductase (EC 1.3.1.34)
  - 55) Alkanesulfonate ABC transporter ATP-binding protein SsuB

- 
- 56) Ribonuclease III (EC 3.1.26.3)
  - 57) RNA polymerase sporulation specific sigma factor SigE
  - 58) 16S rRNA (guanine(527)-N(7))-methyltransferase (EC 2.1.1.170)
  - 59) 5'-methylthioadenosine/S-adenosylhomocysteine nucleosidase related protein BA2564
  - 60) Uncharacterized protein YwmB
  - 61) N-acetylglucosaminyl-L-malate N-acetyl hydrolase
  - 62) ClpCP protease substrate adapter protein MecA
  - 63) SAM-dependent methyltransferase Rv1498c
  - 64) Phosphopantothenoylcysteine synthetase (EC 6.3.2.5)
  - 65) Substrate-specific component ThiT of thiamin ECF transporter
  - 66) Uncharacterized membrane protein YtaF
  - 67) Cell envelope stress response system LiaFSR, response regulator LiaR(VraR)
  - 68) Redox-sensing transcriptional repressor Rex
  - 69) DUF1054 superfamily protein
  - 70) Phosphohydrolase (MutT/nudix family protein)
  - 71) putative secreted protein
  - 72) Hydrolase, haloacid dehalogenase-like family
  - 73) Nucleoside 5-triphosphatase RdgB (dHAPTP, dITP, XTP-specific) (EC 3.6.1.66)
  - 74) Conserved membrane protein in copper uptake, YcnI
  - 75) Uncharacterized protein YhbD
  - 76) hypothetical protein
  - 77) Secreted and spore coat-associated protein 1, similar to biofilm matrix component TasA and to camelysin
  - 78) putative lipoprotein
  - 79) hypothetical protein
  - 80) Possible caffeoyl-CoA O-methyltransferase (EC 2.1.1.104)
  - 81) UPF0398 protein YpsA
  - 82) Uncharacterized membrane protein YuaF
  - 83) ATP synthase delta chain (EC 3.6.3.14)

- 
- 84) Possible colicin V production protein
  - 85) SAM-dependent methyltransferase
  - 86) DUF402 family nucleoside diphosphatase
  - 87) Putative metal-dependent hydrolase YfiT
  - 88) ThiJ/PfpI family protein YhbO
  - 89) tRNA (cytidine(34)-2'-O)-methyltransferase (EC 2.1.1.207)
  - 90) UPF0302 protein YpiB
  - 91) Cyclic pyranopterin monophosphate synthase (EC 4.6.1.17)
  - 92) Uncharacterized protein YpoC
  - 93) Inosine/xanthosine triphosphatase
  - 94) UPF0478 protein YtxG
  - 95) UPF0756 membrane protein YtwI
  - 96) hypothetical protein
  - 97) Uncharacterized N-acetyltransferase BT9727\_3663 (EC 2.3.1.-)
  - 98) Uncharacterized membrane protein YqhR
  - 99) DNA topology modulation protein FlaR
  - 100) LSU ribosomal protein L9p

**Table S1.** Unique genetic variants, with a predicted high impact on protein product, of the ISS *Bacillus* strain/s compared with *B. anthracis* str. Ames; the data were extracted from the results presented in Figure 5 based on the PATRIC RAST Sequence-based Comparison tool.

| Strain(s) name(s)                  | Unique genetic variants of the strain/s compared with <i>B. anthracis</i> str. Ames | Unique variant with a predicted high impact on protein product | Gene product                                | Effect of the variant |
|------------------------------------|-------------------------------------------------------------------------------------|----------------------------------------------------------------|---------------------------------------------|-----------------------|
| <i>Bacillus</i> sp. ISSFR-23F      | 51                                                                                  | 1                                                              | Ferrous iron transporter FeoB               | Frameshift variant    |
| <i>Bacillus</i> sp. ISSFR-9F       | 22                                                                                  | 2                                                              | Efflux ABC transporter, ATP-binding protein | Start lost            |
|                                    |                                                                                     |                                                                | Uncharacterized protein YknW                | Frameshift variant    |
| <i>Bacillus</i> sp. JEM-1          | 51                                                                                  | 1                                                              | Hypothetical protein                        | Start lost            |
| <i>Bacillus</i> sp. S2-R3J1-FB-BA1 | 127                                                                                 | 2                                                              | Hypothetical protein                        | Stop lost             |
|                                    |                                                                                     |                                                                | Hypothetical protein                        | Start lost            |
| <i>Bacillus</i> sp. ISSFR-25F      | 287                                                                                 | 4                                                              | Signal transduction histidine kinase CheA   | Frameshift variant    |
|                                    |                                                                                     |                                                                | Hypothetical protein                        | Stop lost             |
|                                    |                                                                                     |                                                                | Hypothetical protein                        | Frameshift variant    |
|                                    |                                                                                     |                                                                | Hypothetical protein                        | Frameshift variant    |
| <i>Bacillus</i> sp. S1-R2T1-FB     | 87                                                                                  | 2                                                              | Hypothetical protein                        | Stop gained           |

|                                                                                                                               |    |   |                                                                          |                    |
|-------------------------------------------------------------------------------------------------------------------------------|----|---|--------------------------------------------------------------------------|--------------------|
|                                                                                                                               |    |   | Hypothetical protein                                                     | Frameshift variant |
| Bacillus sp. ISSFR-23F, Bacillus sp. ISSFR-9F                                                                                 | 5  | 1 | MBL-fold metallo-hydrolase superfamily                                   | Start loss         |
| Bacillus sp. ISSFR-23F, Bacillus sp. JEM-1                                                                                    | 15 | 1 | Flagellin protein FlaA                                                   | Frameshift variant |
| Bacillus sp. ISSFR-23F, Bacillus sp. ISSFR-9F, Bacillus sp. JEM-1                                                             | 16 | 1 | Nutrient germinant receptor inner membrane subunit A (GerKA/GerAA/GerBA) | Frameshift variant |
| Bacillus sp. ISSFR-23F, Bacillus sp. ISSFR-9F, Bacillus sp. S2-R3J1-FB-BA1                                                    | 3  | 1 | Hypothetical protein                                                     | Start loss         |
| Bacillus sp. ISSFR-23F, Bacillus sp. ISSFR-9F, Bacillus sp. S1-R2T1-FB                                                        | 2  | 1 | Efflux ABC transporter, permease protein                                 | Frameshift variant |
| Bacillus sp. ISSFR-23F, Bacillus sp. JEM-2, Bacillus sp. ISSFR-9F, Bacillus sp. JEM-1                                         | 6  | 1 | Mobile element protein                                                   | Frameshift variant |
| Bacillus sp. ISSFR-23F, Bacillus sp. JEM-2, Bacillus sp. JEM-1, Bacillus sp. S1-R4H1-FB                                       | 53 | 2 | FMN reductase, NADPH-dependent                                           | Stop gained        |
|                                                                                                                               |    |   | Uncharacterized protein YknW                                             | Frameshift variant |
| Bacillus sp. ISSFR-23F, Bacillus sp. JEM-2, Bacillus sp. ISSFR-9F, Bacillus sp. JEM-1, Bacillus sp. S1-R4H1-FB                | 88 | 1 | Hypothetical protein                                                     | Frameshift variant |
| Bacillus sp. S1-R4H1-FB, Bacillus sp. S2-R3J1-FB-BA1, Bacillus sp. S1-R1J2-FB, Bacillus sp. ISSFR-25, Bacillus sp. S1-R2T1-FB | 1  | 1 | Mobile element protein                                                   | Frameshift variant |
| Bacillus sp. ISSFR-23F, Bacillus sp. JEM-2, Bacillus sp. ISSFR-9F, Bacillus sp. JEM-1,                                        | 58 | 2 | Uncharacterized protein YpbB                                             | Frameshift variant |

|                                                                                                                                                                                               |      |    |                                                                                                                                                                                                                |                                                                                                                                             |
|-----------------------------------------------------------------------------------------------------------------------------------------------------------------------------------------------|------|----|----------------------------------------------------------------------------------------------------------------------------------------------------------------------------------------------------------------|---------------------------------------------------------------------------------------------------------------------------------------------|
| Bacillus sp. S1-R4H1-FB, Bacillus sp. S1-R1J2-FB                                                                                                                                              |      |    | Quaternary ammonium compound-resistance protein                                                                                                                                                                | Frameshift variant                                                                                                                          |
| Bacillus sp. ISSFR-23F, Bacillus sp. JEM-2, Bacillus sp. ISSFR-9F, Bacillus sp. JEM-1, Bacillus sp. S1-R4H1-FB, Bacillus sp. S2-R3J1-FB-BA1, Bacillus sp. S1-R1J2-FB                          | 53   | 2  | Single-stranded DNA-binding protein<br>UDP-N-acetylmuramoyl-dipeptide--2,6-diaminopimelate ligase (EC 6.3.2.13)                                                                                                | Stop gained<br>Frameshift variant                                                                                                           |
| Bacillus sp. ISSFR-23F, Bacillus sp. JEM-2, Bacillus sp. ISSFR-9F, Bacillus sp. JEM-1, Bacillus sp. S1-R4H1-FB, Bacillus sp. S1-R1J2-FB, Bacillus sp. S1-R2T1-FB                              | 146  | 2  | 2',3'-cyclic-nucleotide 2'-phosphodiesterase (EC 3.1.4.16)<br>Wall-associated protein precursor                                                                                                                | Stop gained<br>Frameshift variant                                                                                                           |
| Bacillus sp. ISSFR-23F, Bacillus sp. JEM-2, Bacillus sp. JEM-1, Bacillus sp. S1-R4H1-FB, Bacillus sp. S2-R3J1-FB-BA1, Bacillus sp. S1-R1J2-FB, Bacillus sp. S1-R2T1-FB                        | 17   | 1  | Hypothetical protein                                                                                                                                                                                           | Frameshift variant                                                                                                                          |
| Bacillus sp. ISSFR-23F, Bacillus sp. JEM-2, Bacillus sp. ISSFR-9F, Bacillus sp. JEM-1, Bacillus sp. S1-R4H1-FB, Bacillus sp. S2-R3J1-FB-BA1, Bacillus sp. S1-R1J2-FB, Bacillus sp. S1-R2T1-FB | 1047 | 17 | Hypothetical protein<br>Hypothetical protein<br>MBL-fold metallo-hydrolase superfamily<br>Hypothetical protein<br>Hypothetical protein<br>Hypothetical protein<br>Hypothetical protein<br>Hypothetical protein | Stop lost<br>Frameshift variant<br>Stop gained<br>Stop lost<br>Frameshift variant<br>Frameshift variant<br>Frameshift variant<br>Start lost |



|                                                                                                                                                                                                  |  |   |                                    |                    |
|--------------------------------------------------------------------------------------------------------------------------------------------------------------------------------------------------|--|---|------------------------------------|--------------------|
|                                                                                                                                                                                                  |  |   | Hypothetical protein               | Frameshift variant |
|                                                                                                                                                                                                  |  |   | Hypothetical protein               | Stop gained        |
|                                                                                                                                                                                                  |  |   | Putative membrane protein          | Frameshift variant |
|                                                                                                                                                                                                  |  |   | Hypothetical protein               | Frameshift variant |
|                                                                                                                                                                                                  |  |   | Hypothetical protein               | Stop gained        |
|                                                                                                                                                                                                  |  |   | Phage protein                      | Stop lost          |
|                                                                                                                                                                                                  |  |   | Phage protein                      | Stop gained        |
|                                                                                                                                                                                                  |  |   | Putative membrane-spanning protein | Frameshift variant |
|                                                                                                                                                                                                  |  |   | Hypothetical protein               | Frameshift variant |
| Bacillus sp. ISSFR-23F, Bacillus sp. JEM-2,118<br>Bacillus sp. ISSFR-9F, Bacillus sp. JEM-1,<br>Bacillus sp. S1-R4H1-FB, Bacillus sp. S1-R1J2-FB, Bacillus sp. ISSFR-25, Bacillus sp. S1-R2T1-FB |  | 2 | Hypothetical protein               | Stop lost          |
|                                                                                                                                                                                                  |  |   | Hypothetical protein               | Start lost         |
|                                                                                                                                                                                                  |  |   |                                    |                    |

**Table S2.** Proteins lacking (indicated with "-") at least in one ISS strain compared with *B. anthracis* str. Ames, the data were extracted from the results showed in Fig.5 (based on PATRIC RAST Sequence-based Comparison tool).

[illegible]

|                                                               |   |   |   |   |   |   |   |   |   |
|---------------------------------------------------------------|---|---|---|---|---|---|---|---|---|
| Dienelactone hydrolase family protein                         | - | + | + | + | + | + | + | + | + |
| Uncharacterized protein YqjZ                                  | - | + | + | + | + | + | + | + | + |
| DNA-binding protein                                           | - | + | + | + | + | + | + | + | + |
| putative lipoprotein                                          | - | + | + | + | + | + | + | + | + |
| MBL-fold metallo-hydrolase superfamily                        | - | + | + | + | + | + | + | + | + |
| Beta-lactamase inhibitory protein II                          | - | - | - | - | - | - | - | - | - |
| Exosporium protein G                                          | + | + | + | + | + | + | + | - | + |
| Uncharacterized oxidoreductase                                | - | - | - | - | - | - | - | - | - |
| Uncharacterized oxidoreductase                                | - | - | - | - | - | - | - | - | - |
| Putative ESAT-secreted protein, BA2187 homolog                | - | + | + | + | + | + | + | + | + |
| Putative ESAT-secreted protein, BA2188 homolog                | - | + | + | + | + | + | + | + | + |
| Putative ESAT-secreted protein, BA2189 homolog                | - | + | + | + | + | + | + | + | + |
| TSPc, tail specific protease                                  | - | - | - | - | - | - | - | - | - |
| Membrane protein                                              | + | + | + | + | + | + | + | - | + |
| putative lipoprotein                                          | - | - | - | - | - | - | - | - | - |
| Bacillus cereus group-specific protein, uncharacterized       | - | - | - | - | - | - | - | - | - |
| SAM-dependent methyltransferase                               | - | - | - | - | - | - | - | - | - |
| Uncharacterized methyltransferase YbaJ                        | - | - | - | - | - | - | - | - | - |
| Protein distantly related to SAM-dependent methyltransferases | - | + | + | + | + | + | + | + | + |
| Excinuclease ABC subunit A domain protein                     | - | + | + | + | + | + | + | - | + |
| putative lipoprotein                                          | - | - | - | - | - | - | - | - | - |
| Resolvase                                                     | - | - | - | + | - | - | + | + | - |
| Mobile element protein                                        | - | - | - | - | - | - | - | - | - |
| Quaternary ammonium compound-resistance protein               | - | - | - | - | - | - | - | - | - |
| intein homing endonuclease-related protein                    | - | - | - | - | - | - | - | - | - |
| possible chromosomal replication initiator protein            | - | + | + | + | + | + | + | + | + |
